# Supplementary material for: Monitoring Sexually Transmitted Infections in Cervicovaginal Exfoliative Samples in Mexican Women
Source: MDPI journal article supplement (doi:10.3390/pathogens10121618), 2021-12-13
Supplement: s1 [file s1]

Supplementary Table S1. Primers sequences.

| <i>Pathogen</i>              | <b>Primer Name</b> | <b>Sequence</b>        |
|------------------------------|--------------------|------------------------|
| <i>Mycoplasma spp.</i>       | M2_Myspp_F1        | CACACCGTAAACGATAGATACT |
|                              | M2_Myspp_F2        | CACGCCGTAAACGATGATCATT |
|                              | M2_Myspp_R1        | AGTCTAGGTAAGGTTTTTCGTG |
|                              | M2_Myspp_R2        | GAGTGGGTAAGGTTTTCCGTGT |
| <i>Ureaplasma spp.</i>       | M1_Uspp_F1         | TCGCTCTTTGTGGCGACGCTTT |
|                              | M1_Uspp_R1         | ACTTACAAACCCGCCTGCGCTC |
| <i>Candida spp.</i>          | M1_Caspp_F1        | CTTGGCTGGCCGGTCCATCTTT |
|                              | M1_Caspp_R1        | AGCCTTGCGACCATACTCCCC  |
| <i>Neisseria gonhorroae</i>  | M1_Nego_F1         | GCCGCGATAAACCGTGGGAACA |
|                              | M1_Nego_R1         | CGGCTGTTGTGCGTTTGATGCC |
| <i>Trichomonas vaginalis</i> | M1_Trva_F1         | ACCGAAACCTAGCAGAGGGCCA |
|                              | M1_Trva_R1         | GACGCCTTCGCCTCAGCTTCTC |
| Human Herpes Virus           | M1_HSV_F1          | GCCCTGGTCGACCTGCTGTTTT |
|                              | M1_HSV_R1          | GTCTGCTCAGTTCGGCGGTGAG |
